# Supplementary material for: A finite-cluster phase in λ-DNA-coated colloids
Source: Royal Society of Chemistry journal article supplement (doi:10.1039/b618028k), 2007-01-01
Supplement: b618028k.pdf [file b618028k.pdf]

**Supplementary information to:**

**Communication Ref.: B618028K**

**Title: A finite-cluster phase in Lambda-DNA-coated colloids**

Long-time observations of the cluster formation of our DNA-coated colloids show that equilibrium finite-size clusters have grown within a day (Fig. 2d), but stopped growing further. A one month old sample (Fig. S1) shows that the clusters stay size-limited.

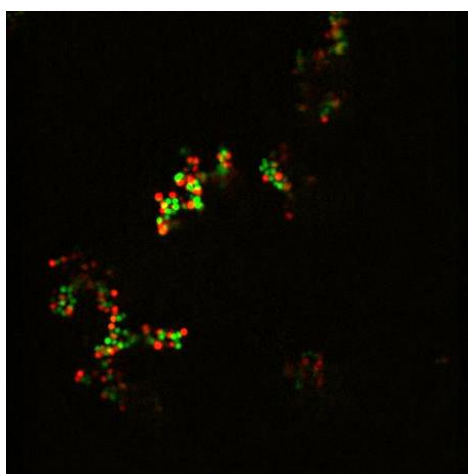

Figure S1: Confocal image of the clusters observed after 1 month.
